# Supplementary material for: Prediction of two planar carbon allotropes with large meshes
Source: Royal Society of Chemistry journal article supplement (doi:10.1039/c5cp04319k), 2015-11-26
Supplement: c5cp04319k3.pdf [file c5cp04319k3.pdf]

## Supplementary Materials

ShuangYing Ma<sup>a</sup>, L. Z. Sun<sup>b, †</sup> and K. W. Zhang<sup>a ‡</sup>

<sup>a</sup> School of Physics and Optoelectronics, Xiangtan University, Xiangtan 411105, China. E-mail:

*kwzhang@xtu.edu.cn*

<sup>b</sup> Hunan Provincial Key laboratory of Thin Film Materials and Devices, School of Material

Sciences and Engineering, Xiangtan University, Xiangtan 411105, China. E-mail:

*lzsun@xtu.edu.cn*

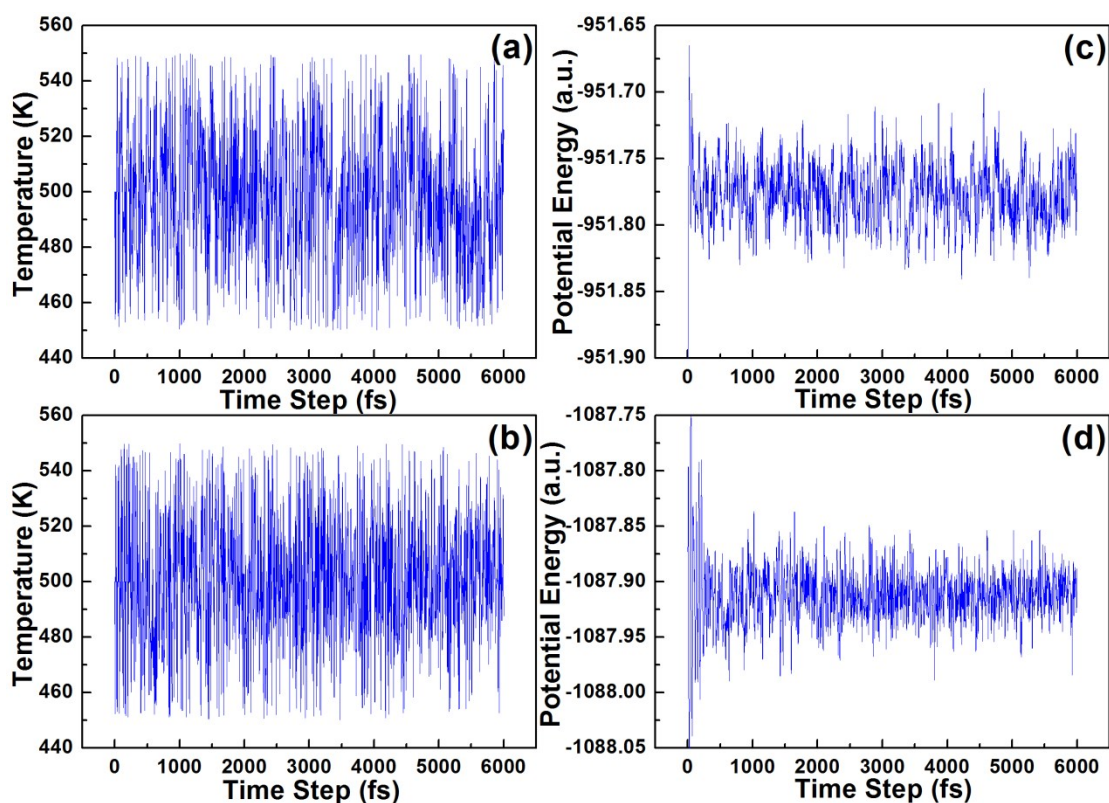

Fig. S1 (a) and (b) are the temperature of C<sub>y</sub> and C<sub>z</sub> in function of time steps, respectively. (c) and (d) are the total energy of C<sub>y</sub> and C<sub>z</sub> in function of time steps, respectively. All data were obtained by performing ab initio molecular dynamics simulations.

(a) band structure with strain for  $C_z$  along lattice vector  $a$

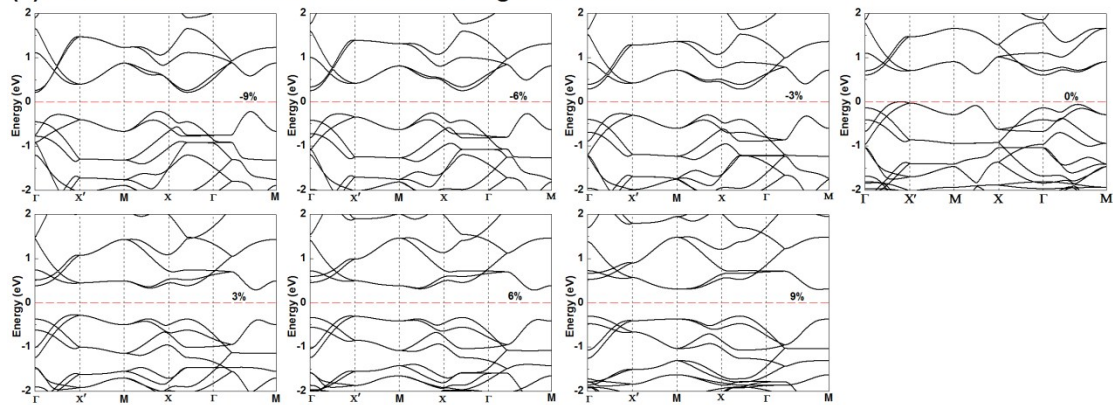

(b) band structure with strain for  $C_z$  along lattice vector  $c$

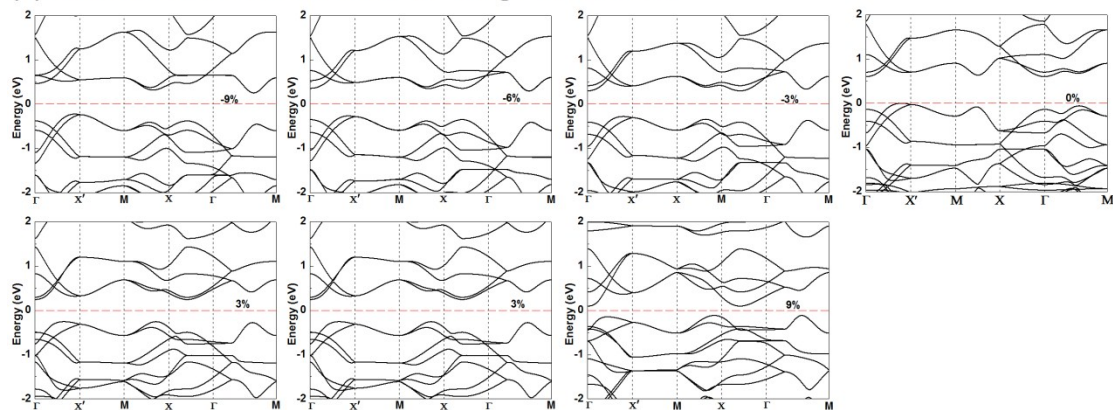

Fig. S2: (a) and (b) show the band gap as a function of strain for  $C_y$  and  $C_z$ .
